# Supplementary material for: A bionanocomposite based on 1,4-diazabicyclo-[2.2.2]-octane cellulose nanofiber cross-linked-quaternary polysulfone as an anion conducting membrane
Source: Royal Society of Chemistry journal article supplement (doi:10.1039/c6ta05611c), 2016-01-01
Supplement: c6ta05611c1.pdf [file c6ta05611c1.pdf]

Supporting information for

## A bionanocomposite based on 1,4-diazabicyclo-[2.2.2]-octane cellulose nanofibers crosslinked-quaternary polysulfone as anion conducting membrane

Gautam Das,<sup>a</sup> Bang Ju Park<sup>b</sup> and Hyon Hee Yoon<sup>a\*</sup>

<sup>a</sup>Department of Chemical and Biological Engineering, Gachon University, Gyeonggi-Do 406-701, Republic of South Korea

<sup>b</sup>Department of Electronic Engineering, Gachon University, Gyeonggi-Do 461-701, Republic of South Korea

Email: hhyoon@gachon.ac.kr

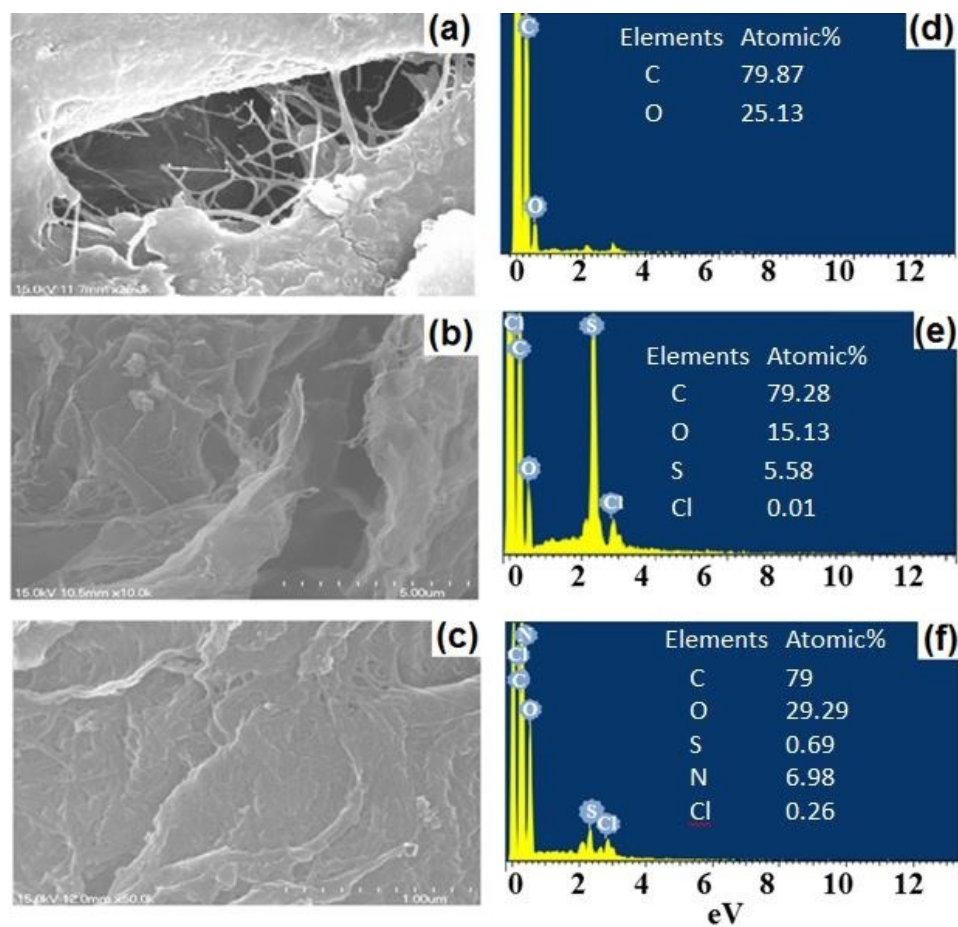

Fig. S1: (a), (b) & (c) SEM micrographs and (d), (e) & (f) EDX spectra of cellulose, tosylated cellulose and, quaternized cellulose, respectively.

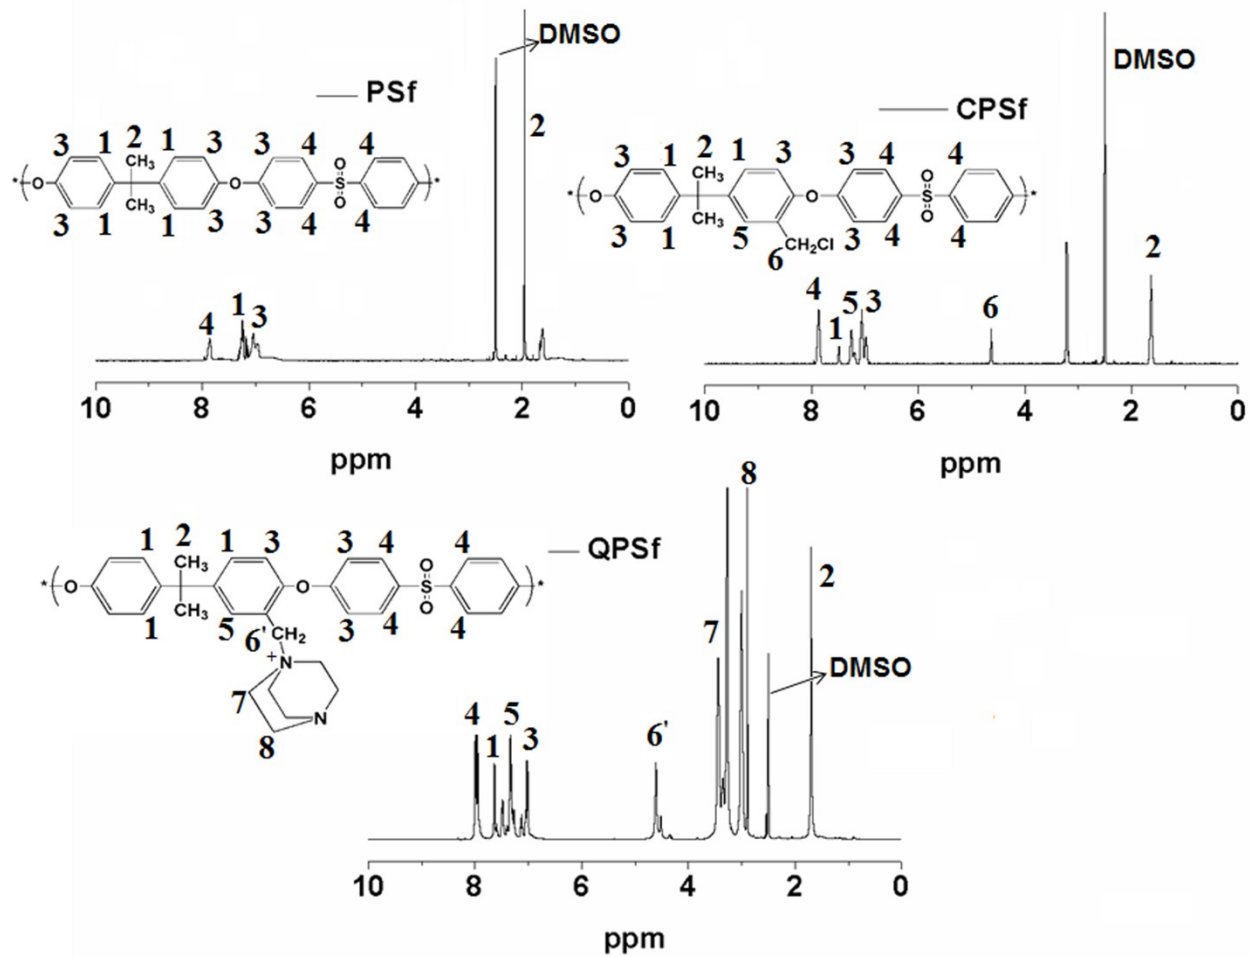

Fig. S2:  $^1\text{H}$ NMR spectra.

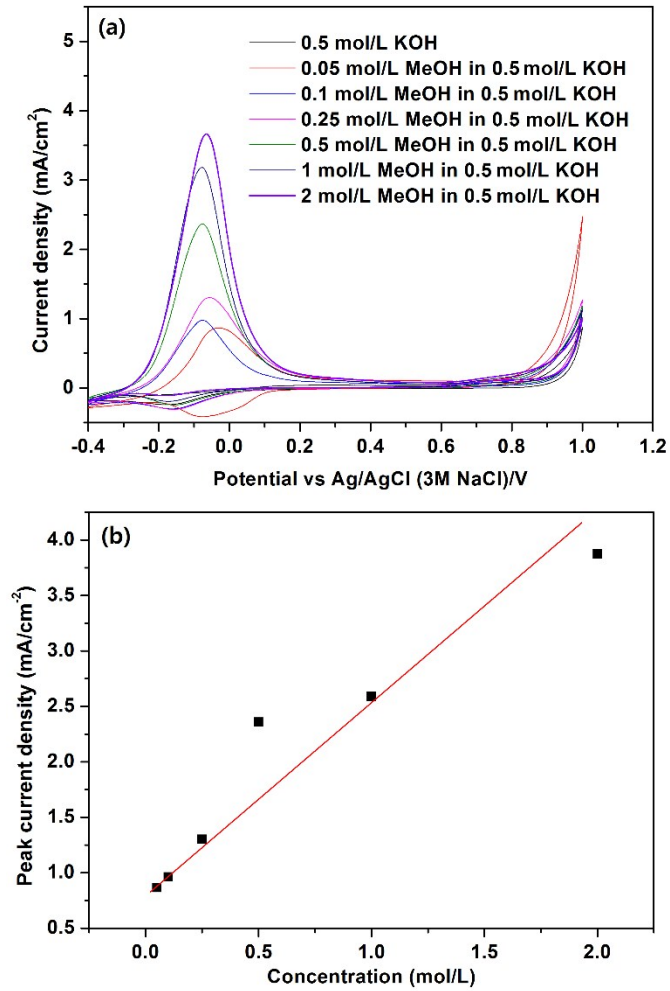

**Fig. S3:** (a) CV plots of different concentrations of methanol (MeOH) in 0.5 mol/L KOH at a scanning rate of 20 mV/s, and (b) calibration plot of peak current density with methanol concentration.

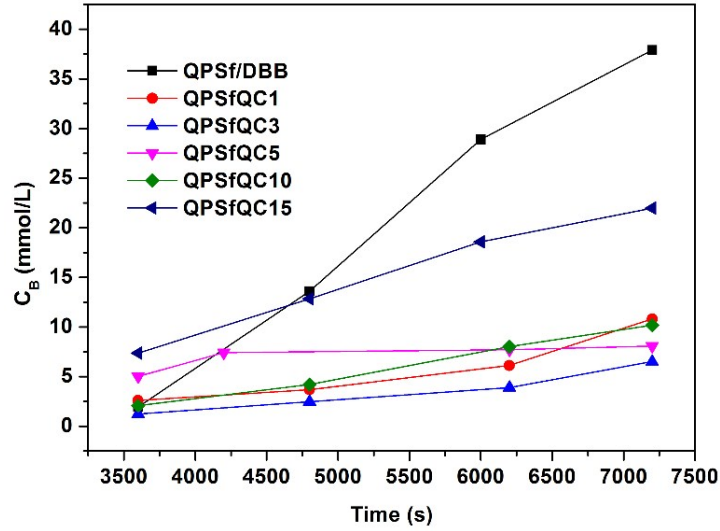

**Fig. S4:** Plot of methanol (MeOH) concentrations with time in compartment B for different membranes. The methanol permeability coefficient was calculated from the slope of the fitted line of the different membranes following the equation given below,<sup>1,2</sup>

$$DK = \frac{\text{Slope} \times C_B \times V_B \times L}{A \times C_A}$$

Where,  $D$  is the methanol diffusivity,  $K$  is the partition coefficient,  $C_A$  is the methanol concentration in the feed side of a two compartment H-type cell (compartment A),  $C_B$  is the concentration of methanol permeated into compartment B,  $V_B$  is the volume of the methanol permeation side i.e. Compartment B,  $A$  is the area of the and  $L$  is the thickness of membrane that is clamped between the two compartments.

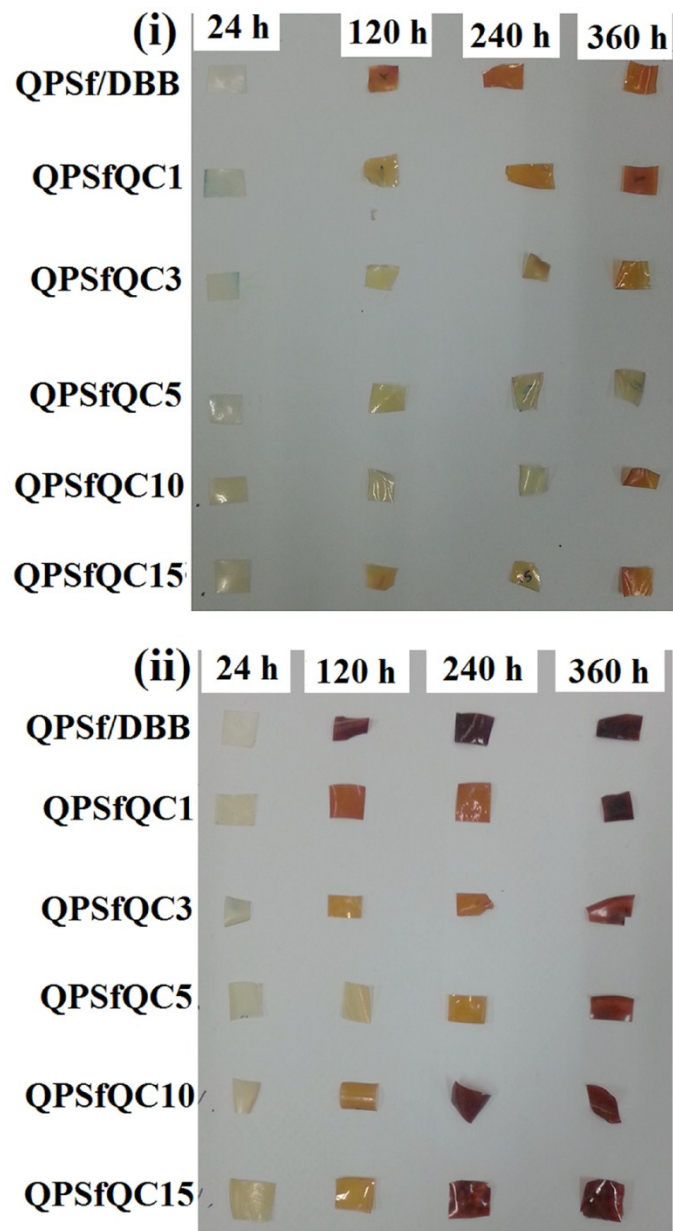

**Fig. S5:** Optical images of the membranes after treatment with 3 M KOH solution at different time intervals under (i) ambient conditions and (ii) at 60 °C, respectively.

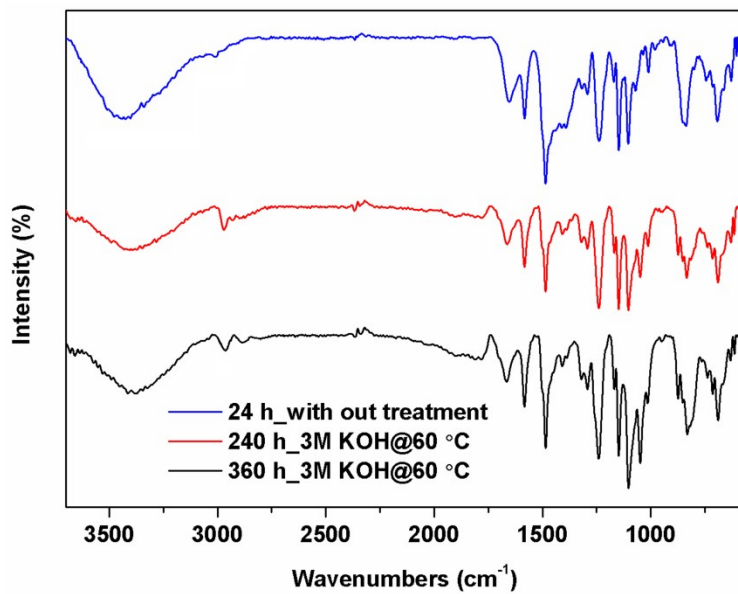

Fig. S6: Representative FTIR spectra of QPSfQC5 after immersion in 3 M KOH solution at 60 °C for different time intervals.

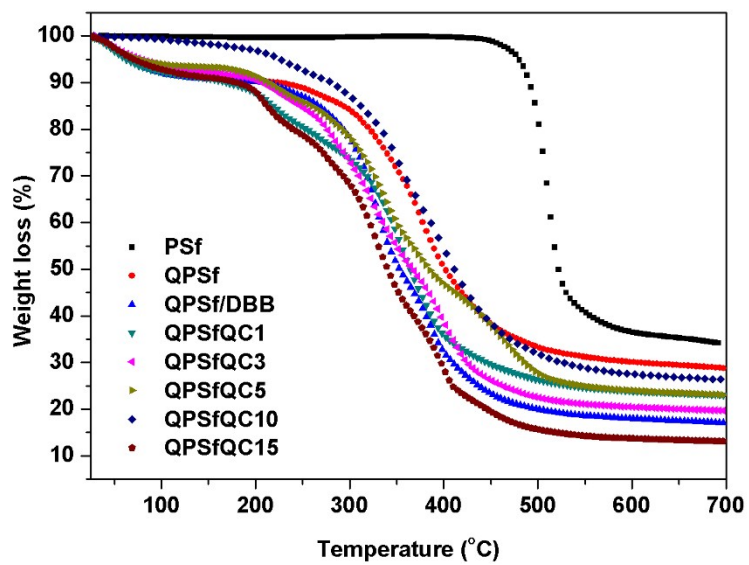

Fig. S7: TGA thermogram of the different membranes.

**Table S1.** Methanol permeability coefficient for the different membranes obtained from the time vs. concentration plot as shown in Fig. S4.

| Sample code | Methanol permeability coefficient<br>(cm <sup>2</sup> /s) x 10 <sup>-6</sup> |
|-------------|------------------------------------------------------------------------------|
| QPSf/DBB    | 3.28                                                                         |
| QPSfQC1     | 0.35                                                                         |
| QPSfQC3     | 0.46                                                                         |
| QPSfQC5     | 0.084                                                                        |
| QPSfQC10    | 0.416                                                                        |
| QPSfQC15    | 0.409                                                                        |

**Table S2.** Mechanical properties in dry state of the membranes

| Sample code | Tensile strength (MPa) | Elongation at break (%) |
|-------------|------------------------|-------------------------|
| PSf         | 27.7                   | 9.53                    |
| QPSf/DBB    | 10.93                  | 21.8                    |
| QPSfQC1     | 13.13                  | 21.19                   |
| QPSfQC3     | 15.06                  | 14.02                   |
| QPSfQC5     | 17.44                  | 13.41                   |
| QPSfQC10    | 19.58                  | 13.22                   |
| QPSfQC15    | 19.79                  | 18.56                   |

**Table S3.** Mechanical properties in wet state of the membranes

| Sample code | Tensile strength (MPa) | Elongation at break (%) |
|-------------|------------------------|-------------------------|
| QPSf/DBB    | 3.83                   | 41.98                   |
| QPSfQC1     | 11.56                  | 9.35                    |
| QPSfQC3     | 4.28                   | 32.14                   |
| QPSfQC5     | 6.75                   | 39.34                   |
| QPSfQC10    | 8.67                   | 29.65                   |
| QPSfQC15    | 6.40                   | 16.04                   |



## References

- 1 K. Ramya and K. Dhathathreyan, *J. Memb. Sci.*, 2008, **311**, 121-127.
- 2 J. Ling, G. Longtin and O. Savadogo, *Asia-Pacific J. Chem. Eng.*, 2009, **4**, 25-32.
